# Supplementary material for: Ammonia decomposition mediated at nitrogen vacancies on NaCl-type binary metal nitrides supporting transition metal nanoparticles
Source: Royal Society of Chemistry journal article supplement (doi:10.1039/d4cc02250e), 2024-01-01
Supplement: d4cc02250e1.pdf [file d4cc02250e1.pdf]

# Supporting Information

## **Ammonia decomposition mediated at nitrogen vacancy on NaCl-type binary metal nitride supported with transition metal nanoparticles**

Masayoshi Miyazaki,<sup>†</sup> Kiya Ogasawara,<sup>†</sup> Yousuke Takekoshi,<sup>†</sup> Kazuki Miyashita,<sup>†</sup>  
Hitoshi Abe,<sup>‡</sup> Yasuhiro Niwa,<sup>‡</sup> Hideo Hosono<sup>\*,†</sup> and Masaaki Kitano,<sup>\*,†,§</sup>

<sup>†</sup> *MDX Research Center for Element Strategy, International Research Frontiers Initiative, Tokyo Institute of Technology, 4259 Nagatsuta, Midori-ku, Yokohama 226-8503, Japan*

<sup>‡</sup> *Institute of Materials Structure Science, High Energy Accelerator Research Organization, 1-1, Oho, Tsukuba, Ibaraki 305-0801, Japan*

<sup>§</sup> *Advanced Institute for Materials Research (WPI-AIMR), Tohoku University, Sendai 980-8577, Japan*

Hideo Hosono

E-mail: [hosono@mces.titech.ac.jp](mailto:hosono@mces.titech.ac.jp), Tel: +81-45-924-5009,

Masaaki Kitano

E-mail: [kitano.m.aa@m.titech.ac.jp](mailto:kitano.m.aa@m.titech.ac.jp), Tel: +81-45-924-5191,

## 1. Experimental

### 1.1. Sample preparation

The LaN and CeN were synthesized by the nitridation of LaH<sub>3</sub> and CeH<sub>3</sub> as previously reported in the literature.<sup>1</sup> The LaH<sub>3</sub> and CeH<sub>3</sub> were, in turn, prepared by hydrogenation of pieces of La and Ce metal (99.9%, Rare Metallic Co.) under 1.5 MPa of H<sub>2</sub> gas at room temperature for 2 h. LaN and CeN were subsequently prepared from the hydride powders by heating at 600 °C under a N<sub>2</sub> gas flow (10 mL·min<sup>-1</sup>) for 12 h. Other nitride materials (YN, ZrN, and HfN) were purchased from the Kojundo Chemical Laboratory. CeN with high surface area (CeN-HS) was synthesized via nitridation of a CeH<sub>2</sub> nanopowder made by an arc-evaporation method as previously reported.<sup>2</sup> Nickel-supported catalysts were synthesized by H<sub>2</sub> reduction reactions of mixtures of Ni( $\eta$ -C<sub>5</sub>H<sub>5</sub>)<sub>2</sub> (98.0%, Tokyo Chemical Industry) and various support materials at 250 °C for 1.5 h.

### 1.2. Catalytic reactions

Each ammonia decomposition reaction was conducted in a fixed-bed plug-flow silica glass tube reactor at ambient pressure. Each of the prepared catalysts was pretreated by heating under a N<sub>2</sub>/H<sub>2</sub> mixed gas flow (N<sub>2</sub>:H<sub>2</sub>=1:3, 20 mL·min<sup>-1</sup>) at 500 °C for 1 h. Catalytic performance and stability tests were conducted using 0.1 g catalyst specimens over the range of 360–660 °C in a stream of pure NH<sub>3</sub> gas (25 mL·min<sup>-1</sup>), corresponding to a weight hourly space velocity (WHSV) of 15,000 mL<sub>NH<sub>3</sub></sub>·g<sup>-1</sup>·h<sup>-1</sup>. Effluent gases were analyzed with an online gas chromatograph (GC-14A, incorporating a thermal conductivity detector and Porapak OS column, Shimadzu, with He as the carrier gas). The NH<sub>3</sub> conversion was calculated as

$$X_{NH_3} = \frac{C_{NH_3, 0} - C_{NH_3}}{C_{NH_3, 0} + C_{NH_3}} \quad (1)$$

Where  $C_{NH_3, 0}$  is the concentration of NH<sub>3</sub> in the inlet gas and  $C_{NH_3}$  is the concentration in the outlet gas. Trials involving <sup>15</sup>N-labeled NH<sub>3</sub> gas decomposition were performed at 500 °C over both the Ni/CeN and CeN specimens in a U-shaped quartz glass reactor connected to a closed gas

circulation system. These experiments each employed 75 mg of the catalyst and introduced 4.0 mmol  $^{15}\text{NH}_3$  (98% isotopic purity).

### 1.3. Characterization

The crystal structures of the catalysts were examined by acquiring powder X-ray diffraction (XRD) patterns (D2 PHASER, Bruker) employing Cu K $\alpha$  radiation. To prevent the air exposure of the unstable nitrides (LaN, CeN, and YN), we employed the Ar-sealed XRD holder, which has a broad amorphous diffraction below  $\theta = 25^\circ$ . H $_2$ -TPD and N $_2$ -TPD analyses were conducted using a BELCAT-A apparatus (MicrotracBEL, Japan). Ni K-edge X-ray adsorption fine structure (XAFS) data were obtained using the synchrotron radiation ring at the PF-12C beamline of the KEK Photon Factory with Si(111) single-crystal monochromators. Brunauer–Emmett–Teller (BET) surface areas were calculated based on N $_2$  adsorption–desorption isotherms acquired at 77 K using a BELSORP-mini II apparatus (MicrotracBEL).

### 1.4. Density functional theory calculations

Periodic density functional theory (DFT) calculations based on slab models were performed using the Vienna Ab Initio Simulation Package (VASP) code<sup>3</sup> with the Perdew–Burke–Ernzerhof exchange–correlation functional<sup>4</sup> based on the projector augmented wave (PAW) method.<sup>5,6</sup> The plane-wave basis set was truncated at a kinetic energy of 500 eV and a Monkhorst-Pack k-point grid separation<sup>7</sup> for the Brillouin zone sampling was  $3 \times 3 \times 1$  for each surface models. The convergence criteria for structural optimization and energy calculations comprised an SCF tolerance of  $1.0 \times 10^{-6}$  eV per atom, an energy tolerance of  $5.0 \times 10^{-5}$  eV per atom and a maximum force tolerance of  $0.05 \text{ eV} \cdot \text{\AA}^{-1}$ . The DFT + U method (DFT plus Hubbard-U parameter) was employed for all DFT calculations.<sup>8</sup> The effective Hubbard-U parameter, that is,  $U - J$ , was set to 7.0 eV (Ce) and 4.0 eV (La). The formation Energy of N $^{3-}$  vacancies on each nitride surface was defined as

$$E_f(V_N) = \{E(S^d) + 0.5 \times E(N_2)\} - E(S^p)$$

Where  $E(A)$  represents the total energy of system A and  $S^d$  and  $S^p$  represent Nitrides and without surface  $V_N$ , respectively.

## Table

**Table S1.** Specific surface area of nitrides.

| Nitrides | Specific surface area<br>( $\text{m}^2 \cdot \text{g}^{-1}$ ) |
|----------|---------------------------------------------------------------|
| CeN      | 3.5                                                           |
| CeN-HS   | 23.1                                                          |
| LaN      | 1.9                                                           |
| YN       | 4.0                                                           |
| ZrN      | 1.0                                                           |
| HfN      | 0.1                                                           |

**Table S2.** Summary of previously reported Ni-supported catalyst for ammonia decomposition.

| Catalysts                            | Ni content<br>(wt%) | T<br>( $^{\circ}\text{C}$ ) | WHSV<br>( $\text{mLg}_{\text{cat}}^{-1}\text{h}^{-1}$ ) | Conversion<br>(%) | $\text{H}_2$ production rate<br>( $\text{mmol}_{\text{H}_2\text{g}_{\text{cat}}^{-1}\text{min}^{-1}}$ ) | $\text{H}_2$ production rate<br>( $\text{mmol}_{\text{H}_2\text{g}_{\text{Ni}}^{-1}\text{min}^{-1}}$ ) | Ref.      |
|--------------------------------------|---------------------|-----------------------------|---------------------------------------------------------|-------------------|---------------------------------------------------------------------------------------------------------|--------------------------------------------------------------------------------------------------------|-----------|
| Ni/CeN-HS                            | 10                  | 500                         | 15000                                                   | 86.4              | 14.5                                                                                                    | 144.6                                                                                                  | This work |
| Ni/CeN                               | 5                   | 500                         | 15000                                                   | 51.2              | 8.6                                                                                                     | 171.4                                                                                                  | This work |
| Ni/LaN                               | 5                   | 500                         | 15000                                                   | 39.3              | 6.6                                                                                                     | 131.6                                                                                                  | This work |
| Ni/YN                                | 5                   | 500                         | 15000                                                   | 16.7              | 2.8                                                                                                     | 55.9                                                                                                   | This work |
| Ni/ZrN                               | 5                   | 500                         | 15000                                                   | 5.2               | 0.9                                                                                                     | 17.4                                                                                                   | This work |
| Ni/HfN                               | 5                   | 500                         | 15000                                                   | 0.9               | 0.2                                                                                                     | 3                                                                                                      | This work |
| $\text{NaNH}_2$ -Ni-GNP              | 8                   | 500                         | 60000                                                   | -                 | 13.9                                                                                                    | 173.4                                                                                                  | 9         |
| Ce-Ni/ $\text{Al}_2\text{O}_3$       | 43.4                | 500                         | 30000                                                   | 71.9              | 24.1                                                                                                    | 55.5                                                                                                   | 10        |
| La-Ni/ $\text{Al}_2\text{O}_3$       | 37.9                | 500                         | 30000                                                   | 63.9              | 21.4                                                                                                    | 56.5                                                                                                   | 11        |
| Ni/SBA-15                            | 23.4                | 500                         | 30000                                                   | 57                | 19.1                                                                                                    | 81.6                                                                                                   | 12        |
| Ni/MCM-41                            | 7.2                 | 500                         | 30000                                                   | 26.9              | 9                                                                                                       | 125.1                                                                                                  | 13        |
| Ni/ $\text{SiO}_2$                   | 10                  | 500                         | 30000                                                   | 10.5              | 3.5                                                                                                     | 35.2                                                                                                   | 14        |
| Ni/CNT                               | 2.9                 | 500                         | 30000                                                   | 9                 | 3                                                                                                       | 103.9                                                                                                  | 15        |
| Ni-Ce-Al-O<br>microsphere            | -                   | 500                         | 18000                                                   | 88                | 17.7                                                                                                    | -                                                                                                      | 16        |
| Ni/h-Ba $\text{TiO}_{3-x}\text{N}_y$ | 5                   | 500                         | 15000                                                   | 58                | 9.7                                                                                                     | 194.3                                                                                                  | 17        |
| Ni/CaNH-HS                           | 10                  | 500                         | 15000                                                   | 91.2              | 15.3                                                                                                    | 152.7                                                                                                  | 18        |
| Ni/ $\text{Al}_2\text{O}_3$          | 10                  | 500                         | 15000                                                   | 20                | 3.3                                                                                                     | 33.5                                                                                                   | 18        |
| Ni/CaO                               | 10                  | 500                         | 15000                                                   | 16                | 2.7                                                                                                     | 26.8                                                                                                   | 18        |
| Ni/C12A7:e-<br>Ni doped              | 7.4                 | 500                         | 15000                                                   | 13.3              | 2.2                                                                                                     | 30.1                                                                                                   | 18        |
| $\text{LiNH}_2/\text{C}$             | 5                   | 400                         | 13000                                                   | 53                | 7.7                                                                                                     | 153.8                                                                                                  | 19        |

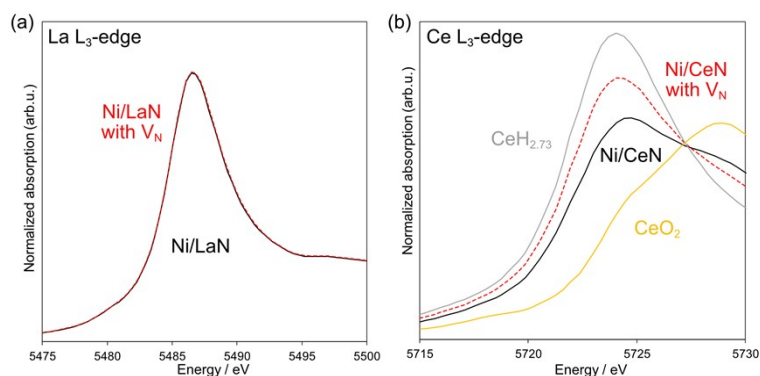

## Figures

**Figure S1.** XANES spectra before and after introduction of V<sub>N</sub> for (a) Ni/LaN and (b) Ni/CeN with the references. CeH<sub>2.73</sub> was prepared by the hydrogenation of metal Ce under 1 MPa H<sub>2</sub> at room temperature. The chemical composition of prepared hydride was determined to be CeH<sub>2.73</sub> by the XRD patterns in previous study.<sup>20</sup>

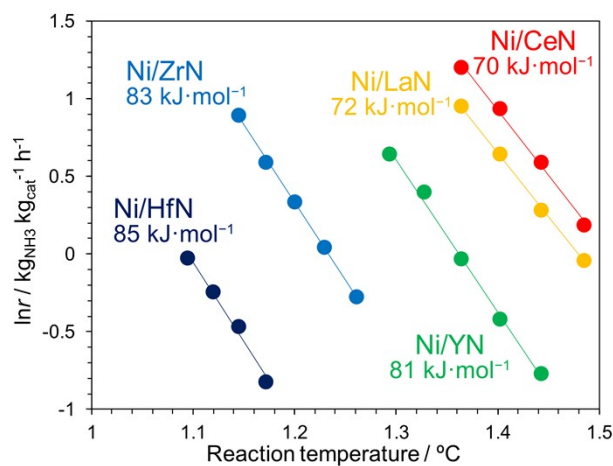

**Figure S2.** Arrhenius plots for ammonia decomposition over Ni/TMN (TM = La, Ce, Y, Zr or Hf) below 30% NH<sub>3</sub> conversion.

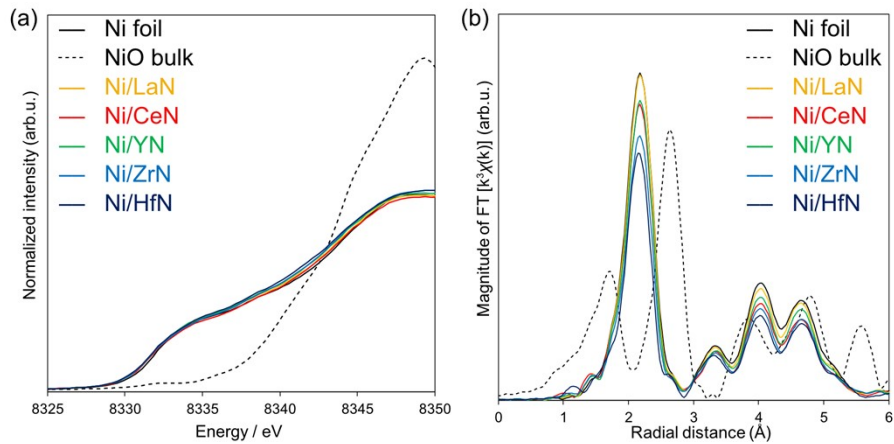

**Figure S3.** (a) Ni K-edge XANES spectra of Ni/nitrides along with Ni and NiO as references. (b) Fourier transform of  $k^3$ -weighted EXAFS oscillations for Ni/nitrides along with those for Ni and NiO.

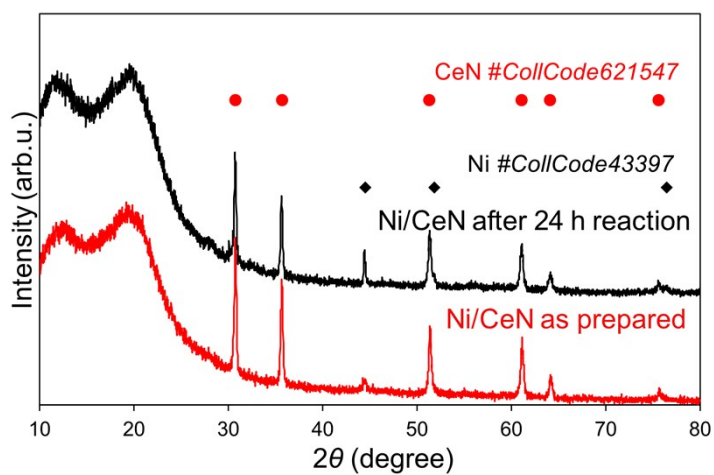

**Figure S4.** XRD patterns for 10 wt% Ni/CeN as prepared and after 24 h ammonia decomposition reaction at  $500^\circ\text{C}$ .

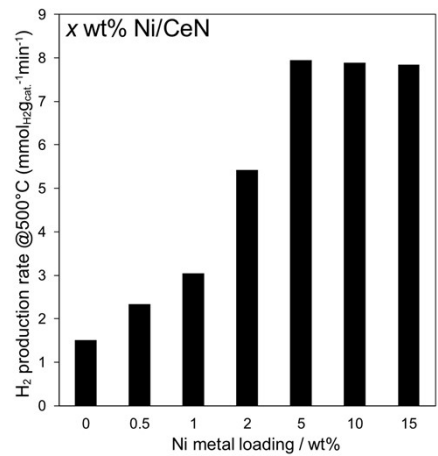

**Figure S5.** Hydrogen production rate obtained with CeN specimens having various Ni loadings.



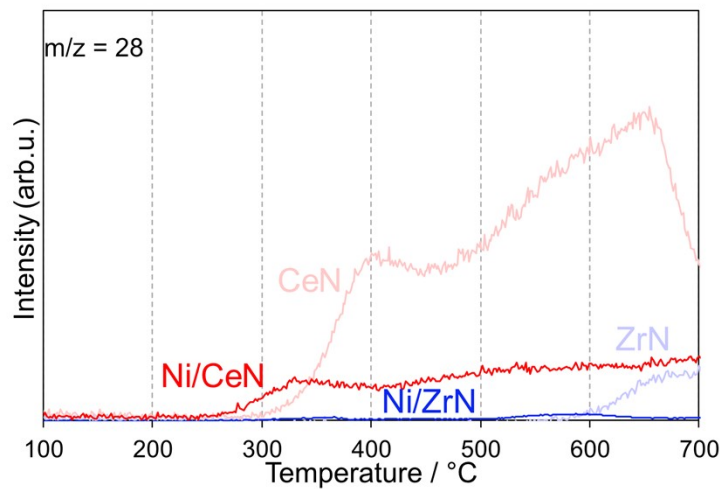

**Figure S6.** TPD profiles for Ni/CeN and Ni/ZrN under He flow based on monitoring at  $m/z = 28$ .

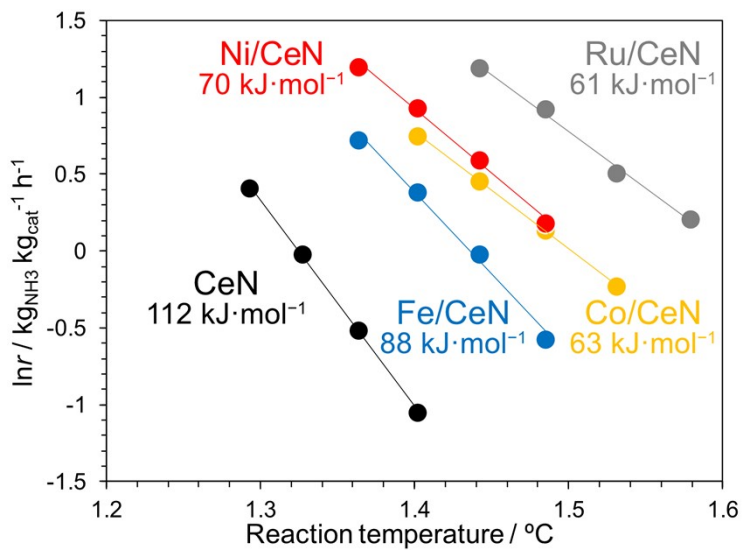

**Figure S7.** Arrhenius plots for ammonia decomposition over M/CeN (M = Ru, Ni, Co or Fe) below 30% NH<sub>3</sub> conversion.

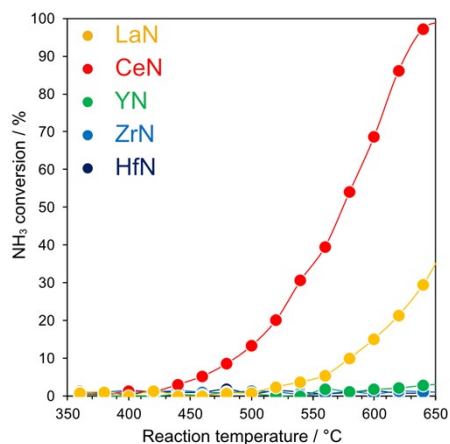

**Figure S8.**  $\text{NH}_3$  conversion during ammonia decomposition over nitrides without metal loading as function of temperature.

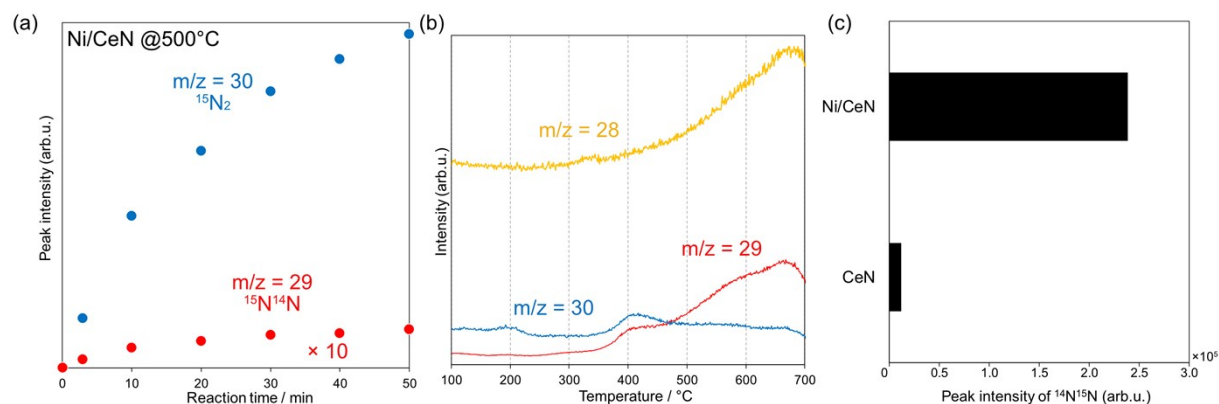

**Figure S9.** (a) Data from  $^{15}\text{NH}_3$  decomposition trial using Ni/CeN at 500 °C. (b)  $\text{N}_2$ -TPD profiles for Ni/CeN after the  $^{15}\text{NH}_3$  decomposition trial at 500 °C. (c)  $^{14}\text{N}^{15}\text{N}$  produced over 30 min during initial state of  $^{15}\text{NH}_3$  decomposition over Ni/CeN and CeN.

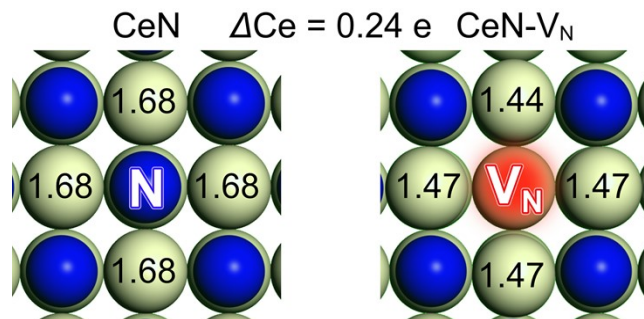

**Figure S10.** Bader charge analysis of nitride surfaces with  $V_N$  formation on CeN (001).

## References

- 1 T.-N. Ye, S.-W. Park, Y. Lu, J. Li, M. Sasase, M. Kitano, T. Tada and H. Hosono, *Nature*, 2020, **583**, 391–395.
- 2 Y. Lu, J. Li, T. N. Ye, Y. Kobayashi, M. Sasase, M. Kitano and H. Hosono, *ACS Catal.*, 2018, **8**, 11054–11058.
- 3 G. Kresse and J. Furthmüller, *Phys. Rev. B*, 1996, **54**, 11169–11186.
- 4 J. P. Perdew, K. Burke and M. Ernzerhof, *Phys. Rev. Lett.*, 1996, **77**, 3865–3868.
- 5 P. E. Blöchl, *Phys. Rev. B*, 1994, **50**, 17953–17979.
- 6 G. Kresse and D. Joubert, *Phys. Rev. B*, 1999, **59**, 1758–1775.
- 7 J. D. Pack and H. J. Monkhorst, *Phys. Rev. B*, 1977, **16**, 1748–1749.
- 8 S. L. Dudarev, G. A. Botton, S. Y. Savrasov, C. J. Humphreys and A. P. Sutton, *Phys. Rev. B*, 1998, **57**, 1505–1509.
- 9 P. L. Bramwell, S. Lentink, P. Ngene and P. E. De Jongh, *J. Phys. Chem. C*, 2016, **120**, 27212–27220.
- 10 W. Zheng, J. Zhang, Q. Ge, H. Xu and W. Li, *Appl. Catal. B Environ.*, 2008, **80**, 98–105.
- 11 J. Zhang, H. Xu, X. Jin, Q. Ge and W. Li, *Appl. Catal. Gen.*, 2005, **290**, 87–96.
- 12 H. Liu, H. Wang, J. Shen, Y. Sun and Z. Liu, *Appl. Catal. Gen.*, 2008, **337**, 138–147.
- 13 X. Li, W. Ji, J. Zhao, S. Wang and C. Au, *J. Catal.*, 2005, **236**, 181–189.
- 14 T. V. Choudhary, C. Sivadinarayana and D. W. Goodman, *Catal. Lett.*, 2001, **72**, 197–201.
- 15 S.-F. Yin, Q.-H. Zhang, B.-Q. Xu, W.-X. Zhu, C.-F. Ng and C.-T. Au, *J. Catal.*, 2004, **224**, 384–396.
- 16 H. Yan, Y.-J. Xu, Y.-Q. Gu, H. Li, X. Wang, Z. Jin, S. Shi, R. Si, C.-J. Jia and C.-H. Yan, *J. Phys. Chem. C*, 2016, **120**, 7685–7696.
- 17 K. Ogasawara, M. Miyazaki, K. Miyashita, H. Abe, Y. Niwa, M. Sasase, M. Kitano and H. Hosono, *Adv. Energy Mater.*, 2023, **13**, 2301286.
- 18 K. Ogasawara, T. Nakao, K. Kishida, T.-N. Ye, Y. Lu, H. Abe, Y. Niwa, M. Sasase, M. Kitano and H. Hosono, *ACS Catal.*, 2021, **11**, 11005–11015.
- 19 F. Chang, H. Wu, R. V. D. Pluijm, J. Guo, P. Ngene and P. E. De Jongh, *J. Phys. Chem. C*, 2019, **123**, 21487–21496.
- 20 L. I. Osadchaya, V. V. Sokolov, L. N. Trushnikova and A. P. Zubareva, *Inorg. Mater.*, 2003, **39**, 1142–1143.
